# Supplementary material for: Genomic signal processing for DNA sequence clustering
Source: PubMed Central journal article supplement (PMC5786891; doi:10.7717/peerj.4264), 2018-01-24
Supplement: peerj-06-4264-s002.pdf [file peerj-06-4264-s002.pdf]

Supplementary file of Mendizabal-Ruiz, et al. *Genetic Signal Processing for DNA Sequence Clustering* (2017).

To test the methodology presented in our paper, we performed various sequence clusterings using different datasets previously tested in the literature (Hoang et al., 2015). These include five genome datasets, i.e. mammal mitochondrion, influenza A virus, human rhinovirus, coronavirus and bacteria. Clustering results are shown below.

In the case of 31 mammal mitochondrial genomes (dataset A), a K7 clustering resulted in the classification of mammal families C1 *Ursidae*, C2 *Bovidae* and *Cetacean*, C3 *Cercopithecidae*, C4 *Hominidae*, C6 *Canidae* and C7 *Felidae*. Cluster 5 contains the *Rodentia* and *Lagomorpha* with the *Erinaceidae* outgroup. This is the result of the early divergence between carnivores, which breaks them in the three tight families, leaving one cluster for the three furthest groups.

The second dataset (B) evaluates the neuraminidase gene, encoded in the sixth segment of the influenza A genome, that is one of two surface genes that identifies the serotypes responsible for virulence and pathogenicity. The K5 clustering resulted in a single swap between a H5N1 and a H1N1 strain in C3 and C4 respectively. This result is similar to that of *k*-mer clustering method tested by Hoang, et al.

The Human rhinovirus dataset (C) did not cluster according to the four genome groups analyzed in HRV-A, HRV-B, HRV-C and HEV-C as outgroup. Instead, K4 clustering divided HRV-A in three groups, with C1 sharing both furthest branches of HRV-A, HRV-C and HEV-C, and C3 with all of HRV-B (Palmenberg et al., 2009). The great diversity of HRV-A created compact clusters distant enough from each other to cluster the loosest groups in each other.

Coronavirus complete genome dataset (D) resulted in accurate K5 clustering with the sole exception of SARS strain ZJ01. Most viruses clustered according to the species they affect. Murine hepatitis virus and Bovine coronavirus, two groups typically grouped together, clustered separately in C2 and C3 respectively, and C1 clustered most Human coronavirus.

Finally, we analyzed eight families of whole bacterial genomes (dataset E). The most interesting result is the segregation of both *E. coli* strains into the separate C5 and C7 clusters, and apart from the *Shigellas* and *Yersinias*, that clustered in C8. Both *Bacilli* genera also clustered separately in C1 and C6. The three remaining clusters held two bacterial families, according to their phylogenetic relatedness.

| Dataset A |        |                          |                       |                    |        |
|-----------|--------|--------------------------|-----------------------|--------------------|--------|
| Mammals   |        |                          |                       |                    |        |
| Cluster   | Number | <i>A priori</i><br>Group | NCBI<br>Accession No. | Name               | Length |
| C1        | 23     | 6                        | DQ402478              | Black bear         | 16832  |
| C1        | 24     | 6                        | AF303110              | Brown bear         | 16868  |
| C1        | 25     | 6                        | AF303111              | Polar bear         | 17020  |
| C1        | 26     | 6                        | EF212882              | Giant panda        | 17017  |
| C2        | 13     | 2                        | AJ002189              | Pig                | 16727  |
| C2        | 14     | 2                        | AF010406              | Sheep              | 16680  |
| C2        | 15     | 2                        | AF533441              | Goat               | 16616  |
| C2        | 16     | 2                        | V00654                | Cow                | 16640  |
| C2        | 17     | 2                        | AY488491              | Buffalo            | 16338  |
| C2        | 31     | 2                        | X72204                | Blue whale         | 16402  |
| C2        | 21     | 3                        | X97336                | Indian rhinoceros  | 16964  |
| C2        | 22     | 3                        | Y07726                | White rhinoceros   | 16829  |
| C3        | 4      | 1                        | X99256                | Gibbon             | 16521  |
| C3        | 5      | 1                        | Y18001                | Baboon             | 16389  |
| C3        | 6      | 1                        | AY863426              | Vervet monkey      | 16586  |
| C3        | 7      | 1                        | NC 002764             | Macaca thibetana   | 17447  |
| C3        | 8      | 1                        | D38115                | Bornean orangutan  | 16389  |
| C3        | 9      | 1                        | NC 002083             | Sumatran orangutan | 16499  |
| C4        | 1      | 1                        | V00662                | Human              | 16569  |
| C4        | 2      | 1                        | D38116                | Pigmy chimpanzee   | 16563  |
| C4        | 3      | 1                        | D38113                | Common chimpanzee  | 16554  |
| C4        | 10     | 1                        | D38114                | Gorilla            | 16472  |
| C5        | 27     | 5                        | AJ001588              | Rabbit             | 16805  |
| C5        | 28     | 7                        | X88898                | Hedgehog           | 17245  |
| C5        | 29     | 4                        | AJ001562              | Dormouse           | 16507  |
| C5        | 30     | 4                        | AJ238588              | Squirrel           | 16602  |
| C6        | 12     | 6                        | U96639                | Dog                | 17009  |
| C6        | 18     | 6                        | EU442884              | Wolf               | 16355  |
| C7        | 11     | 6                        | U20753                | Cat                | 16364  |
| C7        | 19     | 6                        | EF551003              | Tiger              | 16774  |
| C7        | 20     | 6                        | EF551002              | Leopard            | 16990  |

- Group 1
- Group 2
- △ Group 3
- ▽ Group 4
- ▽ Group 5
- △ Group 6
- ◇ Group 7

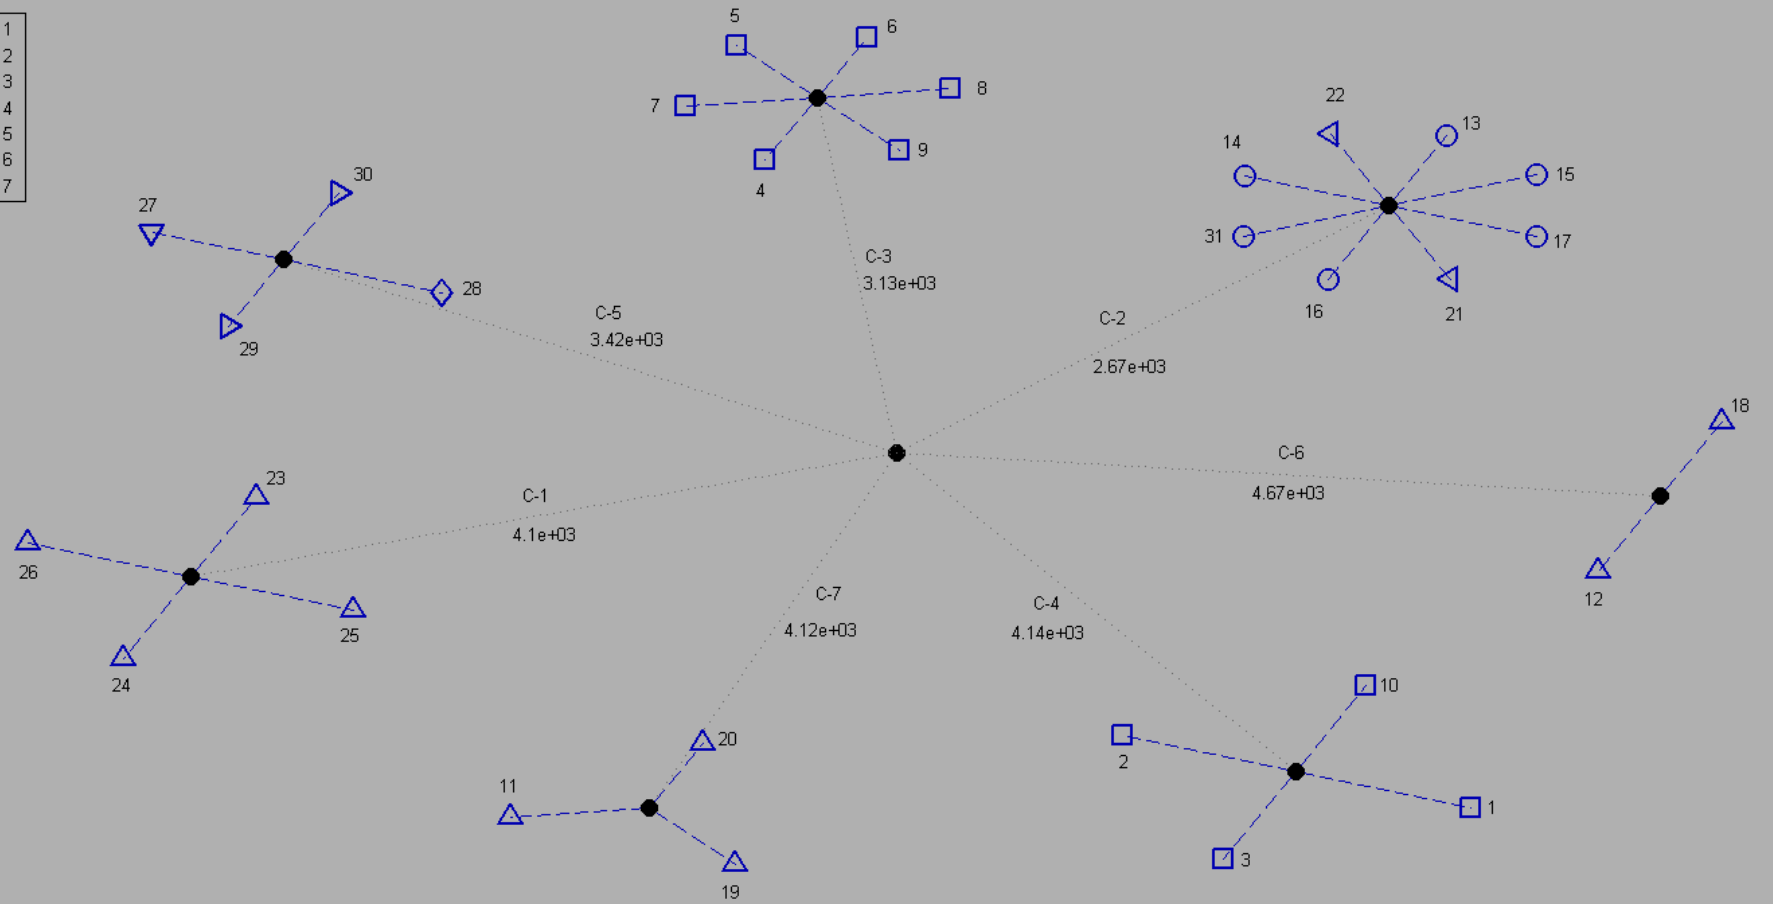

Dataset B  
Influenza A viruses

| Cluster | Number | <i>A priori</i><br>Group | NCBI<br>Accession<br>No. | Name                                                         | Length |
|---------|--------|--------------------------|--------------------------|--------------------------------------------------------------|--------|
| C1      | 25     | 3                        | JX081142                 | A/emperor goose/Alaska/44297-260/2007(H2N2)                  | 1457   |
| C1      | 26     | 3                        | DQ017487                 | A/mallard/Postdam/178-4/1983(H2N2)                           | 1467   |
| C1      | 27     | 3                        | CY005540                 | A/duck/Hong Kong/319/1978(H2N2)                              | 1467   |
| C2      | 28     | 4                        | KF259734                 | A/chicken/Rizhao/713/2013(H7N9)                              | 1398   |
| C2      | 29     | 4                        | KF938945                 | A/chicken/Jiangsu/1021/2013(H7N9)                            | 1404   |
| C2      | 30     | 4                        | KF259688                 | A/duck/Jiangxi/3096/2009(H7N9)                               | 1413   |
| C2      | 31     | 4                        | KC609801                 | A/wild duck/Korea/SH19-47/2010(H7N9)                         | 1426   |
| C2      | 32     | 4                        | CY186004                 | A/mallard/Minnesota/AI09-3770/2009(H7N9)                     | 1422   |
| C2      | 33     | 4                        | CY014788                 | A/turkey/Minnesota/1/1988(H7N9)                              | 1460   |
| C3      | 12     | 2                        | CY149630                 | A/thick-billed murre/Canada/1871/2011(H1N1)                  | 1433   |
| C3      | 13     | 2                        | CY140047                 | A/mallard/Minnesota/Sg-00620/2008(H1N1)                      | 1433   |
| C3      | 14     | 2                        | EU026046                 | A/mallard/Maryland/352/2002(H1N1)                            | 1433   |
| C3      | 15     | 2                        | FJ357114                 | A/mallard/Maryland/26/2003(H1N1)                             | 1433   |
| C3      | 16     | 2                        | CY138562                 | A/mallard/Nova Scotia/00088/2010(H1N1)                       | 1422   |
| C3      | 17     | 2                        | HM370969                 | A/turkey/Ontario/FAV110-4/2009(H1N1)                         | 1419   |
| C3      | 18     | 2                        | KM244078                 | A/turkey/Virginia/4135/2014(H1N1)                            | 1410   |
| C3      | 20     | 2                        | AB470663                 | A/duck/Hokkaido/w73/2007(H1N1)                               | 1422   |
| C3      | 21     | 2                        | HQ897966                 | A/mallard/Korea/KNU YP09/2009(H1N1)                          | 1410   |
| C3      | 22     | 2                        | GQ411894                 | A/dunlin/Alaska/44421-660/2008(H1N1)                         | 1413   |
| C3      | 23     | 2                        | AM157358                 | A/mallard/France/691/2002(H1N1)                              | 1413   |
| C3      | 24     | 2                        | AB546159                 | A/pintail/Miyagi/1472/2008(H1N1)                             | 1410   |
| C3      | 2      | 1                        | GU186511                 | A/turkey/VA/505477-18/2007(H5N1)                             | 1370   |
| C4      | 19     | 2                        | KC608160                 | A/duck/Guangxi/O30D/2009(H1N1)                               | 1398   |
| C4      | 1      | 1                        | FM177121                 | A/chicken/Germany/R3234/2007(H5N1)                           | 1370   |
| C4      | 3      | 1                        | AF509102                 | A/Chicken/Hong Kong/822.1/01 (H5N1)                          | 1366   |
| C4      | 4      | 1                        | HQ185381                 | A/chicken/Eastern China/XH222/2008(H5N1)                     | 1350   |
| C4      | 5      | 1                        | HQ185383                 | A/duck/Eastern China/JS017/2009(H5N1)                        | 1350   |
| C4      | 6      | 1                        | AB684161                 | A/chicken/Miyazaki/10/2011(H5N1)                             | 1350   |
| C4      | 7      | 1                        | JF699677                 | A/mandarin duck/Korea/K10-483/2010(H5N1)                     | 1350   |
| C4      | 8      | 1                        | AM914017                 | A/domestic duck/Germany/R1772/2007(H5N1)                     | 1350   |
| C4      | 9      | 1                        | KF572435                 | A/wild bird/Hong Kong/07035-1/2011(H5N1)                     | 1350   |
| C4      | 10     | 1                        | EU635875                 | A/chicken/Yunnan/chuxiong01/2005(H5N1)                       | 1350   |
| C4      | 11     | 1                        | EF541464                 | A/chicken/Korea/es/2003(H5N1)                                | 1350   |
| C5      | 34     | 5                        | EU500854                 | A/American black duck/NB/2538/2007(H7N3)                     | 1453   |
| C5      | 35     | 5                        | AY646080                 | A/chicken/British Columbia/GSC human B/04(H7N3)              | 1453   |
| C5      | 36     | 5                        | CY076231                 | A/American green-winged teal/California/44242-906/2007(H7N3) | 1420   |
| C5      | 37     | 5                        | CY129336                 | A/American black duck/New Brunswick/02490/2007(H7N3)         | 1428   |
| C5      | 38     | 5                        | CY039321                 | A/avian/Delaware Bay/226/2006(H7N3)                          | 1434   |

- Group 1
- Group 2
- △ Group 3
- ▽ Group 4
- ▽ Group 5

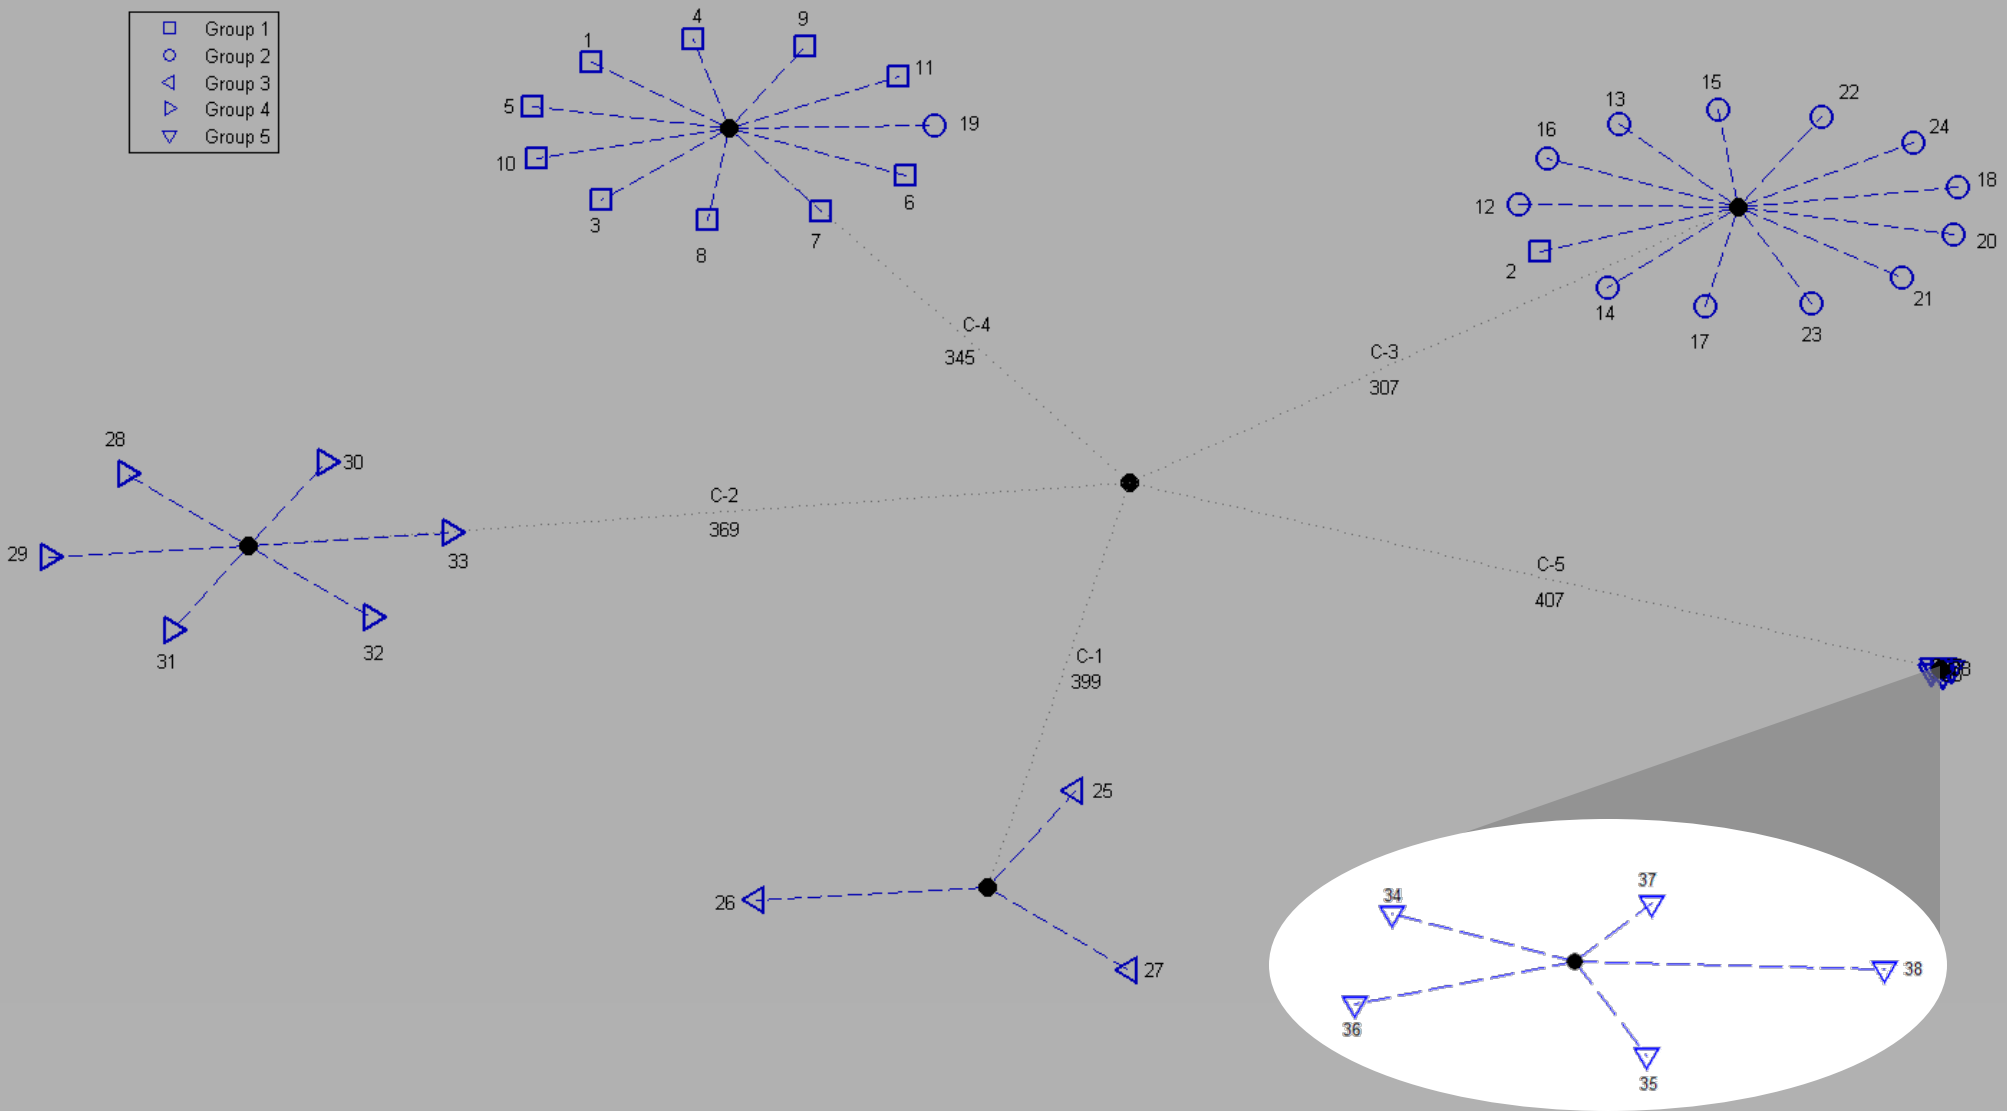

Dataset C  
Human rhinovirus

| Cluster | Number | <i>A priori</i><br>Group | NCBI<br>Accession No. | Name         | Length |
|---------|--------|--------------------------|-----------------------|--------------|--------|
| C1      | 1      | 4                        | AF499637              | HEV_cva-13*  | 7458   |
| C1      | 2      | 4                        | AF546702              | HEV_cva-21*  | 7406   |
| C1      | 115    | 4                        | V01149                | HEV_pv-1m*   | 7440   |
| C1      | 24     | 3                        | EF077279              | C_nat001*    | 6944   |
| C1      | 25     | 3                        | EF077280              | C_nat045*    | 7015   |
| C1      | 31     | 3                        | EF186077              | C_qpm*       | 7134   |
| C1      | 32     | 3                        | EF582385              | C_c024*      | 7099   |
| C1      | 33     | 3                        | EF582386              | C_c025*      | 7114   |
| C1      | 34     | 3                        | EF582387              | C_c026*      | 7086   |
| C1      | 27     | 1                        | EF173415              | A_hrv-12*    | 7124   |
| C1      | 37     | 1                        | FJ445113              | A_hrv-08     | 7108   |
| C1      | 55     | 1                        | FJ445132              | A_hrv-45     | 7114   |
| C1      | 59     | 1                        | FJ445136              | A_hrv-51     | 7152   |
| C1      | 65     | 1                        | FJ445142              | A_hrv-58     | 7140   |
| C1      | 70     | 1                        | FJ445147              | A_hrv-65     | 7162   |
| C1      | 74     | 1                        | FJ445152              | A_hrv-71     | 7161   |
| C1      | 78     | 1                        | FJ445156              | A_hrv-80     | 7138   |
| C1      | 87     | 1                        | FJ445165              | A_hrv-89-f09 | 7150   |
| C1      | 88     | 1                        | FJ445166              | A_hrv-89-f08 | 7152   |
| C1      | 92     | 1                        | FJ445170              | A_hrv-95     | 7110   |
| C1      | 98     | 1                        | FJ445176              | A_hrv-07     | 7146   |
| C1      | 106    | 1                        | FJ445184              | A_hrv-89     | 7152   |
| C1      | 17     | 1                        | DQ473504              | A_hrv-88*    | 7143   |
| C1      | 18     | 1                        | DQ473505              | A_hrv-36*    | 7141   |
| C1      | 19     | 1                        | DQ473506              | A_hrv-46*    | 7149   |
| C1      | 20     | 1                        | DQ473507              | A_hrv-53*    | 7143   |
| C1      | 21     | 1                        | DQ473508              | A_hrv-28*    | 7148   |
| C2      | 9      | 1                        | DQ473491              | A_hrv-41*    | 7145   |
| C2      | 10     | 1                        | DQ473492              | A_hrv-73*    | 7140   |
| C2      | 11     | 1                        | DQ473493              | A_hrv-15*    | 7134   |
| C2      | 22     | 1                        | DQ473510              | A_hrv-75*    | 7137   |
| C2      | 38     | 1                        | FJ445114              | A_hrv-09-f01 | 7134   |
| C2      | 39     | 1                        | FJ445115              | A_hrv-09-f02 | 7133   |
| C2      | 40     | 1                        | FJ445116              | A_hrv-13     | 7140   |
| C2      | 41     | 1                        | FJ445117              | A_hrv-13-f03 | 7143   |
| C2      | 43     | 1                        | FJ445119              | A_hrv-19     | 7135   |
| C2      | 45     | 1                        | FJ445122              | A_hrv-22     | 7129   |
| C2      | 50     | 1                        | FJ445127              | A_hrv-32     | 7133   |

|    |     |   |          |              |      |
|----|-----|---|----------|--------------|------|
| C2 | 54  | 1 | FJ445131 | A_hrv-43     | 7129 |
| C2 | 66  | 1 | FJ445143 | A_hrv-60     | 7139 |
| C2 | 67  | 1 | FJ445144 | A_hrv-61     | 7139 |
| C2 | 72  | 1 | FJ445149 | A_hrv-67     | 7135 |
| C2 | 82  | 1 | FJ445160 | A_hrv-82     | 7123 |
| C2 | 93  | 1 | FJ445171 | A_hrv-96     | 7134 |
| C2 | 99  | 1 | FJ445177 | A_hrv-09     | 7132 |
| C2 | 102 | 1 | FJ445180 | A_hrv-38     | 7136 |
| C2 | 103 | 1 | FJ445181 | A_hrv-64     | 7129 |
| C2 | 107 | 1 | FJ445185 | A_hrv-94     | 7132 |
| C3 | 4   | 2 | DQ473485 | B_hrv-03*    | 7208 |
| C3 | 5   | 2 | DQ473486 | B_hrv-06*    | 7216 |
| C3 | 6   | 2 | DQ473488 | B_hrv-48*    | 7214 |
| C3 | 7   | 2 | DQ473489 | B_hrv-70*    | 7223 |
| C3 | 8   | 2 | DQ473490 | B_hrv-04*    | 7212 |
| C3 | 28  | 2 | EF173420 | B_hrv-17*    | 7219 |
| C3 | 29  | 2 | EF173423 | B_hrv-37*    | 7216 |
| C3 | 30  | 2 | EF173425 | B_hrv-93*    | 7215 |
| C3 | 36  | 2 | FJ445112 | B_hrv-05     | 7212 |
| C3 | 47  | 2 | FJ445124 | B_hrv-26     | 7211 |
| C3 | 53  | 2 | FJ445130 | B_hrv-42     | 7223 |
| C3 | 60  | 2 | FJ445137 | B_hrv-52-f10 | 7216 |
| C3 | 73  | 2 | FJ445151 | B_hrv-69     | 7211 |
| C3 | 75  | 2 | FJ445153 | B_hrv-72     | 7216 |
| C3 | 77  | 2 | FJ445155 | B_hrv-79     | 7224 |
| C3 | 83  | 2 | FJ445161 | B_hrv-83     | 7230 |
| C3 | 84  | 2 | FJ445162 | B_hrv-84     | 7201 |
| C3 | 86  | 2 | FJ445164 | B_hrv-86     | 7213 |
| C3 | 90  | 2 | FJ445168 | B_hrv-91     | 7221 |
| C3 | 91  | 2 | FJ445169 | B_hrv-92     | 7233 |
| C3 | 94  | 2 | FJ445172 | B_hrv-97     | 7207 |
| C3 | 96  | 2 | FJ445174 | B_hrv-99     | 7208 |
| C3 | 108 | 2 | FJ445186 | B_hrv-27     | 7217 |
| C3 | 109 | 2 | FJ445187 | B_hrv-35     | 7224 |
| C3 | 110 | 2 | FJ445188 | B_hrv-52     | 7216 |
| C3 | 113 | 2 | L05355   | B_hrv-14*    | 7212 |
| C4 | 3   | 1 | AY751783 | A_hrv-39*    | 7137 |
| C4 | 12  | 1 | DQ473494 | A_hrv-74*    | 7120 |
| C4 | 13  | 1 | DQ473496 | A_hrv-49*    | 7106 |
| C4 | 14  | 1 | DQ473497 | A_hrv-23*    | 7025 |
| C4 | 15  | 1 | DQ473499 | A_hrv-44*    | 7123 |
| C4 | 16  | 1 | DQ473500 | A_hrv-59*    | 7135 |
| C4 | 23  | 1 | DQ473511 | A_hrv-55*    | 7036 |

|    |     |   |          |              |      |
|----|-----|---|----------|--------------|------|
| C4 | 26  | 1 | EF173414 | A_hrv-11*    | 7125 |
| C4 | 35  | 1 | FJ445111 | A_hrv-01     | 7137 |
| C4 | 42  | 1 | FJ445118 | A_hrv-18     | 7119 |
| C4 | 44  | 1 | FJ445121 | A_hrv-21     | 7134 |
| C4 | 46  | 1 | FJ445123 | A_hrv-25     | 7126 |
| C4 | 48  | 1 | FJ445125 | A_hrv-29     | 7123 |
| C4 | 49  | 1 | FJ445126 | A_hrv-31     | 7131 |
| C4 | 51  | 1 | FJ445128 | A_hrv-33     | 7133 |
| C4 | 52  | 1 | FJ445129 | A_hrv-40     | 7138 |
| C4 | 56  | 1 | FJ445133 | A_hrv-47     | 7132 |
| C4 | 57  | 1 | FJ445134 | A_hrv-49-f04 | 7109 |
| C4 | 58  | 1 | FJ445135 | A_hrv-50     | 7118 |
| C4 | 61  | 1 | FJ445138 | A_hrv-54     | 7134 |
| C4 | 62  | 1 | FJ445139 | A_hrv-54-f05 | 7133 |
| C4 | 63  | 1 | FJ445140 | A_hrv-56     | 7136 |
| C4 | 64  | 1 | FJ445141 | A_hrv-57     | 7134 |
| C4 | 68  | 1 | FJ445145 | A_hrv-62     | 7131 |
| C4 | 69  | 1 | FJ445146 | A_hrv-63     | 7141 |
| C4 | 71  | 1 | FJ445148 | A_hrv-66     | 7139 |
| C4 | 76  | 1 | FJ445154 | A_hrv-77     | 7136 |
| C4 | 79  | 1 | FJ445157 | A_hrv-81     | 7116 |
| C4 | 80  | 1 | FJ445158 | A_hrv-81-f06 | 7116 |
| C4 | 81  | 1 | FJ445159 | A_hrv-81-f07 | 7116 |
| C4 | 85  | 1 | FJ445163 | A_hrv-85     | 7140 |
| C4 | 89  | 1 | FJ445167 | A_hrv-90     | 7124 |
| C4 | 95  | 1 | FJ445173 | A_hrv-98     | 7133 |
| C4 | 97  | 1 | FJ445175 | A_hrv-100    | 7140 |
| C4 | 100 | 1 | FJ445178 | A_hrv-10     | 7137 |
| C4 | 101 | 1 | FJ445179 | A_hrv-30     | 7093 |
| C4 | 104 | 1 | FJ445182 | A_hrv-76     | 7128 |
| C4 | 105 | 1 | FJ445183 | A_hrv-78     | 7145 |
| C4 | 111 | 1 | FJ445189 | A_hrv-34     | 7119 |
| C4 | 112 | 1 | FJ445190 | A_hrv-24     | 7132 |
| C4 | 114 | 1 | L24917   | A_hrv-16*    | 7124 |
| C4 | 116 | 1 | X02316   | A_hrv-02*    | 7102 |



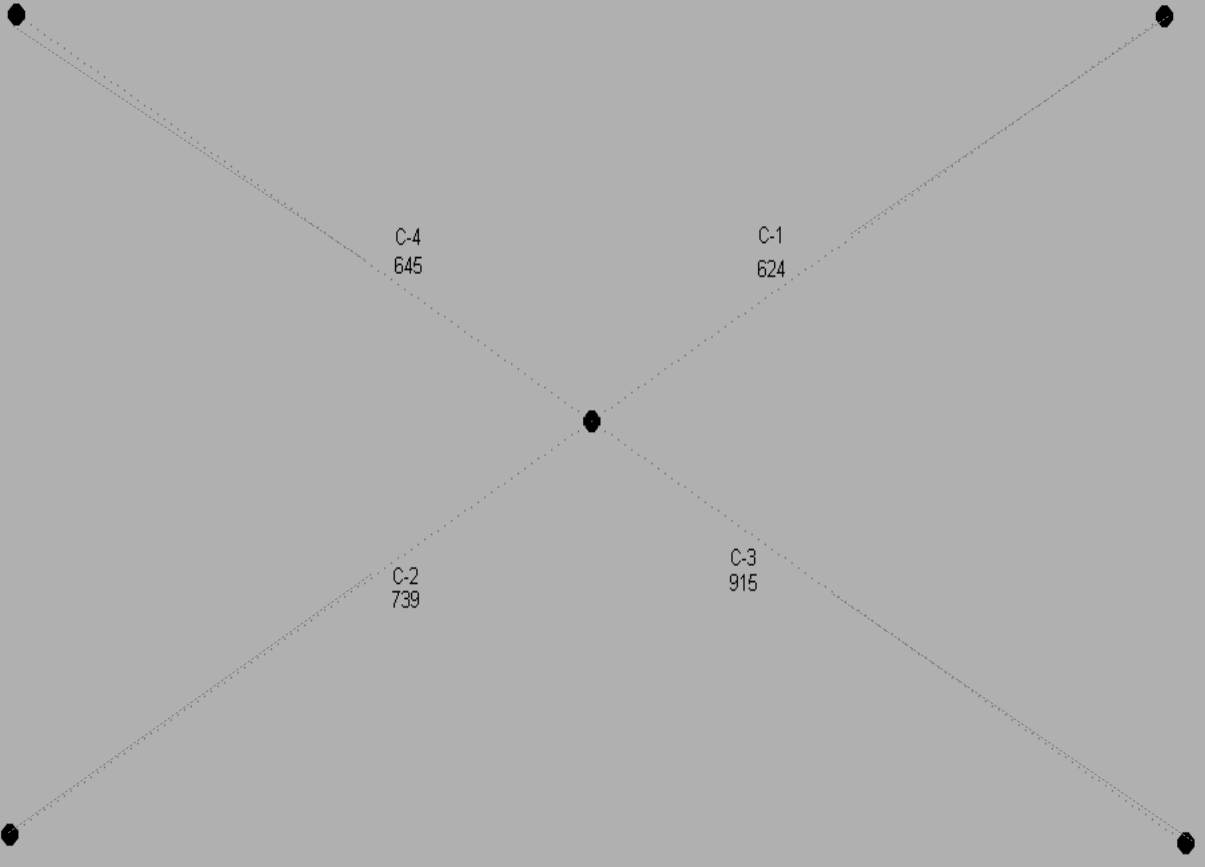

Dataset D  
Coronavirus

| Cluster | No. | <i>A priori</i><br>Group | NCBI<br>Accession No. | Name                                    | Length |
|---------|-----|--------------------------|-----------------------|-----------------------------------------|--------|
| C1      | 16  | 1                        | AF304460              | Human coronavirus 229E                  | 27317  |
| C1      | 17  | 1                        | AF353511              | Porcine epidemic diarrhea virus strain  | 28033  |
| C1      | 29  | 1                        | NC_005831             | Human coronavirus NL63                  | 27553  |
| C1      | 30  | 5                        | NC_006577             | Human coronavirus HKU1                  | 29926  |
| C1      | 13  | 4                        | AY297028              | SARS coronavirus ZJ01                   | 29715  |
| C2      | 20  | 2                        | AF208067              | Murine hepatitis virus strain ML-10     | 31233  |
| C2      | 21  | 2                        | NC_001846             | Murine hepatitis virus                  | 31357  |
| C2      | 22  | 2                        | AF201929              | Murine hepatitis virus strain 2         | 31276  |
| C2      | 23  | 2                        | AF208066              | Murine hepatitis virus strain Penn 97-1 | 31112  |
| C3      | 24  | 2                        | AY391777              | Human coronavirus OC43                  | 30738  |
| C3      | 25  | 2                        | U00735                | Bovine coronavirus strain Mebus         | 31032  |
| C3      | 26  | 2                        | AF220295              | Bovine coronavirus strain Quebec        | 31100  |
| C3      | 27  | 2                        | AF391542              | Bovine coronavirus isolate BCoV-LUN     | 31028  |
| C3      | 28  | 2                        | NC_003045             | Bovine coronavirus                      | 31028  |
| C4      | 18  | 3                        | NC_001451             | Avian infectious bronchitis virus       | 27608  |
| C4      | 19  | 3                        | EU095850              | Turkey coronavirus isolate MG10         | 27657  |
| C5      | 31  | 6                        | NC_001564             | Cell fusing agent virus                 | 10695  |
| C5      | 32  | 6                        | NC_001512             | O'nyong-nyong virus                     | 11835  |
| C5      | 33  | 6                        | NC_001544             | Ross River virus                        | 11657  |
| C5      | 34  | 6                        | NC_004102             | Hepatitis C virus                       | 9646   |
| C6      | 1   | 4                        | AY283794              | SARS coronavirus isolate SIN2500        | 29711  |
| C6      | 2   | 4                        | AY283797              | SARS coronavirus isolate SIN2748        | 29706  |
| C6      | 3   | 4                        | AY283798              | SARS coronavirus isolate SIN2774        | 29711  |
| C6      | 4   | 4                        | AY283796              | SARS coronavirus isolate SIN2679        | 29711  |
| C6      | 5   | 4                        | AY291451              | SARS coronavirus TW1                    | 29729  |
| C6      | 6   | 4                        | AY283795              | SARS coronavirus isolate SIN2677        | 29705  |
| C6      | 7   | 4                        | AY278741              | SARS coronavirus Urbani                 | 29727  |
| C6      | 8   | 4                        | AY278488              | SARS coronavirus BJ01                   | 29725  |
| C6      | 9   | 4                        | AY278491              | SARS coronavirus HKU-39849              | 29742  |
| C6      | 10  | 4                        | AY278554              | SARS coronavirus CUHK-W1                | 29736  |
| C6      | 11  | 4                        | AY282752              | SARS coronavirus CUHK-Su10              | 29736  |
| C6      | 12  | 4                        | NC_004718             | SARS coronavirus TOR2                   | 29751  |
| C6      | 14  | 4                        | AY572034              | SARS coronavirus civet007               | 29540  |
| C6      | 15  | 4                        | AY572035              | SARS coronavirus civet010               | 29518  |

- Group 1
- Group 2
- △ Group 3
- ▽ Group 4
- ▽ Group 5
- △ Group 6

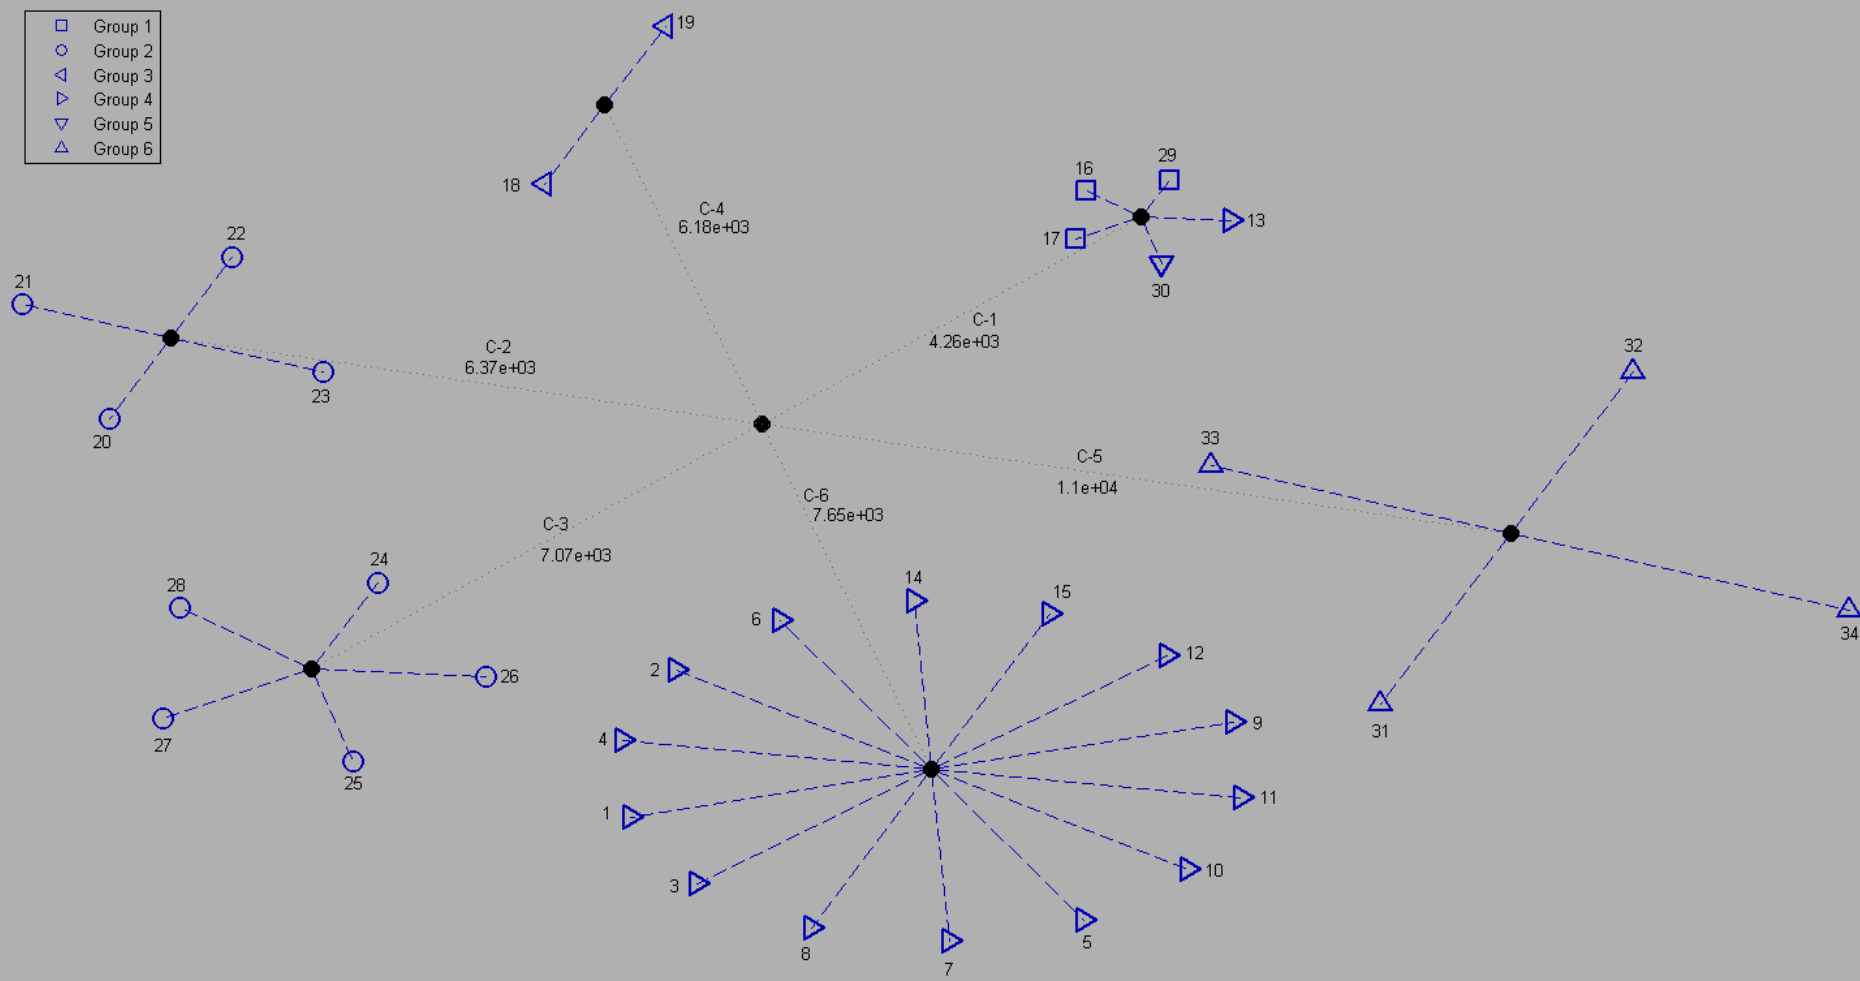

## Dataset E

## Bacteria

| Cluster | Name | <i>A priori</i><br>Group | NCBI<br>Accession No. | Name                                                 | Length  |
|---------|------|--------------------------|-----------------------|------------------------------------------------------|---------|
| C1      | 21   | 7                        | AE017225.1            | <i>Bacillus anthracis</i> Sterne                     | 5228663 |
| C1      | 22   | 7                        | CP001215.1            | <i>Bacillus anthracis</i> CDC 684                    | 5230115 |
| C2      | 1    | 1                        | AM295250.1            | <i>Staphylococcus carnosus</i> carnosus              | 2566424 |
| C2      | 2    | 1                        | AE015929.1            | <i>Staphylococcus epidermidis</i> ATCC 12228         | 2499279 |
| C2      | 3    | 1                        | AP006716.1            | <i>Staphylococcus haemolyticus</i> JCSC1435          | 2685015 |
| C2      | 4    | 1                        | CP001837.1            | <i>Staphylococcus lugdunensis</i> HKU09-01           | 2658366 |
| C2      | 5    | 2                        | CP000246.1            | <i>Clostridium perfringens</i> ATCC 13124            | 3256683 |
| C2      | 6    | 2                        | CP000312.1            | <i>Clostridium perfringens</i> SM101                 | 2897393 |
| C2      | 7    | 2                        | BA000016.3            | <i>Clostridium perfringens</i> 13                    | 3031430 |
| C3      | 13   | 5                        | CP001151.1            | <i>Rhodobacter sphaeroides</i> KD131                 | 1287647 |
| C3      | 14   | 5                        | CP000578.1            | <i>Rhodobacter sphaeroides</i> ATCC 17029            | 1219053 |
| C3      | 15   | 6                        | CP000048.1            | <i>Borrelia hermsii</i> DAH                          | 922307  |
| C3      | 16   | 6                        | CP000049.1            | <i>Borrelia duttonii</i> Ly                          | 931674  |
| C3      | 17   | 6                        | CP000976.1            | <i>Borrelia turicatae</i> 91E135                     | 917330  |
| C3      | 18   | 6                        | CP000993.1            | <i>Borrelia recurrentis</i> A1                       | 930981  |
| C4      | 8    | 3                        | AM260480.1            | <i>Ralstonia eutropha</i> H16                        | 2912490 |
| C4      | 9    | 3                        | CP000091.1            | <i>Ralstonia eutropha</i> JMP134                     | 2726152 |
| C4      | 10   | 4                        | CP000527.1            | <i>Desulfovibrio vulgaris</i> DP4                    | 3462887 |
| C4      | 11   | 4                        | CP002297.1            | <i>Desulfovibrio vulgaris</i> RCH1                   | 3532052 |
| C4      | 12   | 4                        | AE017285.1            | <i>Desulfovibrio vulgaris</i> vulgaris Hildenborough | 3570858 |
| C5      | 23   | 8                        | CP001671.1            | <i>Escherichia coli</i> ABU 83972                    | 5131397 |
| C6      | 19   | 7                        | CP001598.1            | <i>Bacillus anthracis</i> A0248                      | 5227419 |
| C6      | 20   | 7                        | AE016879.1            | <i>Bacillus anthracis</i> Ames                       | 5227293 |
| C7      | 24   | 8                        | CP000468.1            | <i>Escherichia coli</i> APEC O1                      | 5082025 |
| C8      | 25   | 8                        | AE005674.1            | <i>Shigella flexneri</i> 2a 301                      | 4607203 |
| C8      | 26   | 8                        | CP001383.1            | <i>Shigella flexneri</i> 2002017                     | 4650856 |
| C8      | 27   | 8                        | CP001593.1            | <i>Yersinia pestis</i> Z176003                       | 4553586 |
| C8      | 28   | 8                        | AE009952.1            | <i>Yersinia pestis</i> KIM10+                        | 4600755 |
| C8      | 29   | 8                        | AL590842.1            | <i>Yersinia pestis</i> CO92                          | 4653728 |
| C8      | 30   | 8                        | CP001585.1            | <i>Yersinia pestis</i> D106004                       | 4640720 |

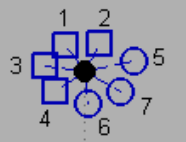

- Group 1
- Group 2
- △ Group 3
- ▷ Group 4
- ▽ Group 5
- ▲ Group 6
- ◇ Group 7
- ★ Group 8

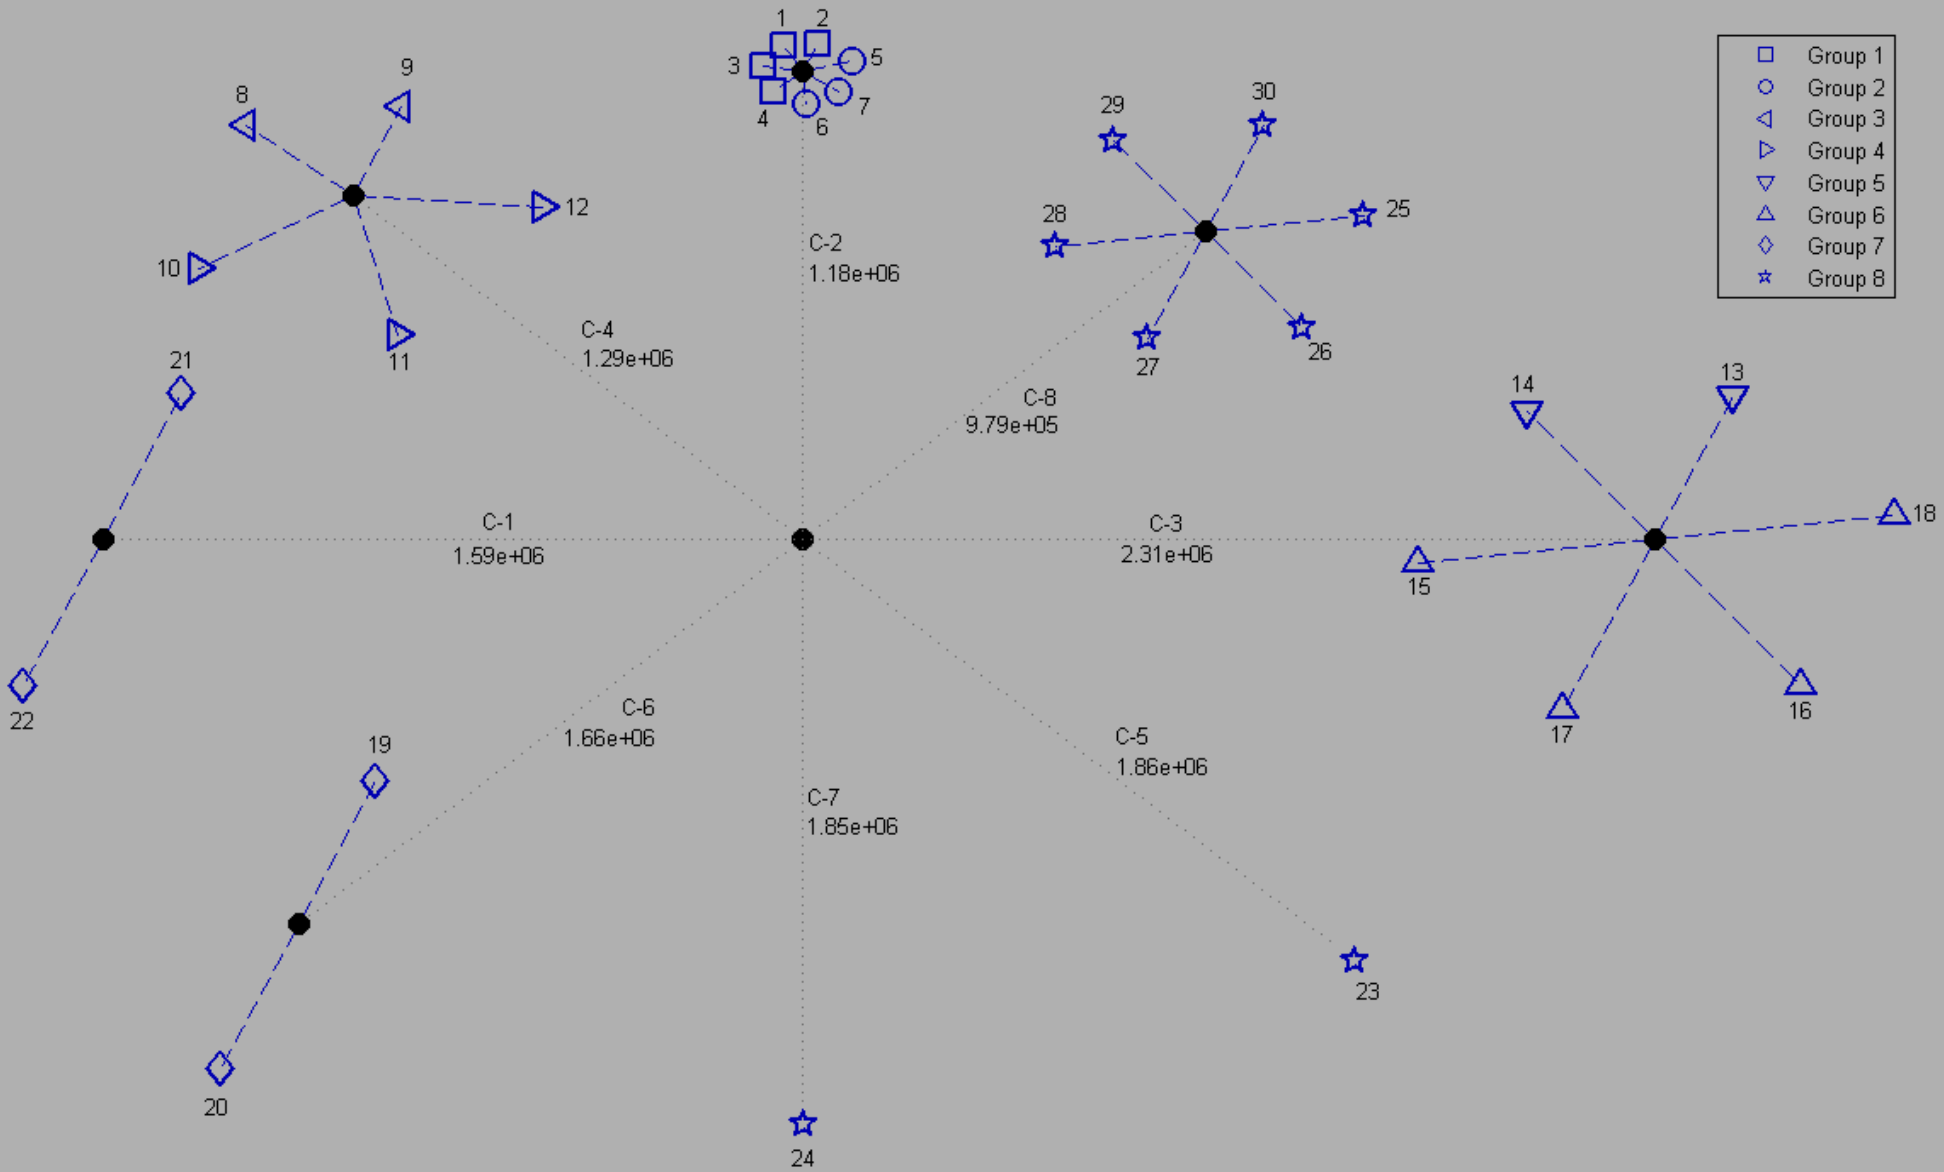

References:

- Hoang, T., Yin, C., Zheng, H., Yu, C., Lucy He, R., & Yau, S. S.-T. (2015). A new method to cluster DNA sequences using Fourier power spectrum. *Journal of Theoretical Biology*, 372, 135–145. <https://doi.org/10.1016/j.jtbi.2015.02.026>
- Palmenberg, A. C., Spiro, D., Kuzmickas, R., Wang, S., Djikeng, A., Rathe, J. A., ... Liggett, S. B. (2009). Sequencing and Analyses of All Known Human Rhinovirus Genomes Reveal Structure and Evolution. *Science*, 324(5923), 55–59. <https://doi.org/10.1126/science.1165557>
